# Supplementary material
Source: PubMed Central journal article supplement (PMC3030381)

Fig.S1

**A**

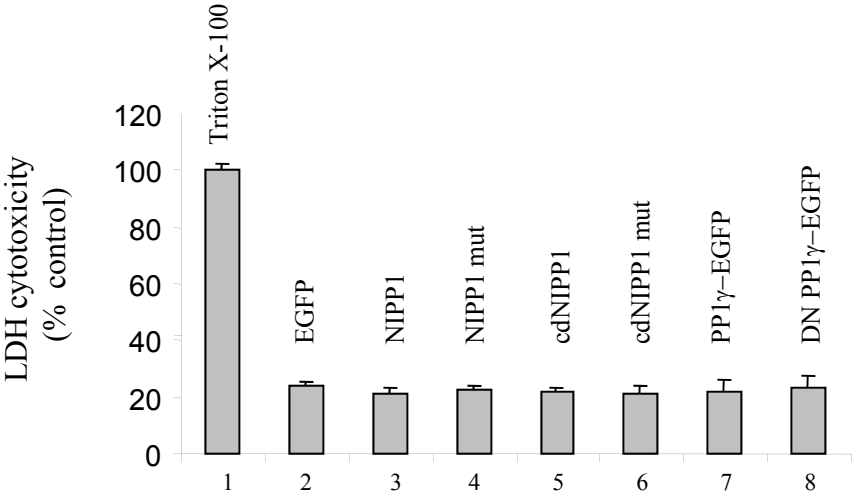

**B**

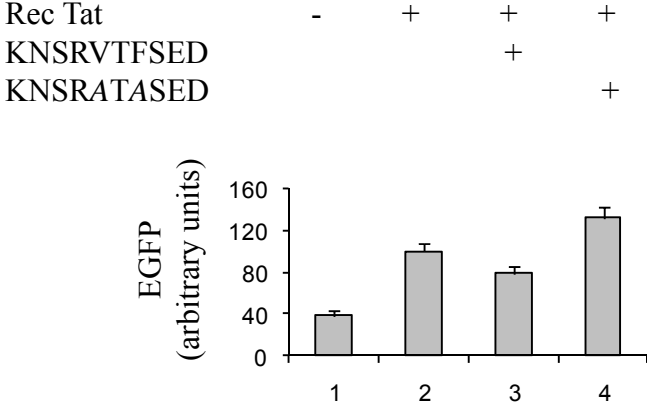

**C**

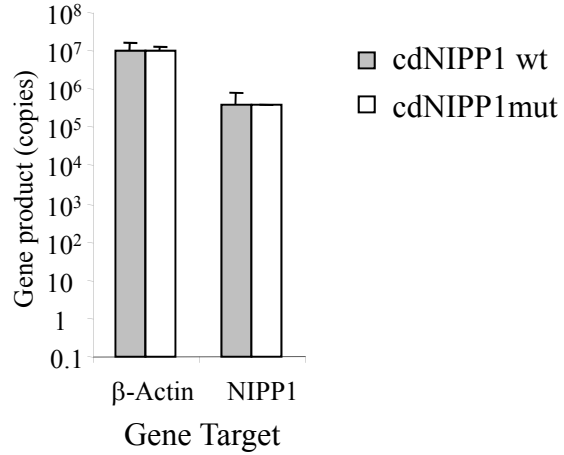

Supplement: supp_M110.196493_Ammosova_cdNIPP1_supplemented__fig.pdf [file supp_M110.196493_Ammosova_cdNIPP1_supplemented__fig.pdf]
